# Supplementary material for: Impact of cover crop and mulching on soil physical properties and soil nutrients in a citrus orchard
Source: PeerJ. 2022 Oct 5;10:e14170. doi: 10.7717/peerj.14170 (PMC9547584; doi:10.7717/peerj.14170)
Supplement: Supplemental Information 1 [file peerj-10-14170-s001.xlsx]

## Sheet: BD and porosity
Soil properties (0-10 cm)						Soil properties (10-20 cm)						Soil properties (20-30 cm)						Soil properties (30-40 cm)
Year	Treatment	Rep.	BD (g/cm3)	Porosity (%)		Year	Treatment	Rep.	BD (g/cm3)	Porosity (%)		Year	Treatment	Rep.	BD (g/cm3)	Porosity (%)		Year	Treatment	Rep.	BD (g/cm3)	Porosity (%)
2019	Control	1	1.23	53.5849		2019	Control	1	1.23	53.5849		2019	Control	1	1.28	51.6981		2019	Control	1	1.24	53.2075
	Control	2	1.2	54.717			Control	2	1.2	54.717			Control	2	1.26	52.4528			Control	2	1.25	52.8302
	Control	3	1.22	53.9623			Control	3	1.24	53.2075			Control	3	1.24	53.2075			Control	3	1.24	53.2075
	Control	4	1.19	55.0943			Control	4	1.24	53.2075			Control	4	1.27	52.0755			Control	4	1.26	52.4528
	NLC	1	1.21	54.3396			NLC	1	1.21	54.3396			NLC	1	1.26	52.4528			NLC	1	1.25	52.8302
	NLC	2	1.2	54.717			NLC	2	1.19	55.0943			NLC	2	1.23	53.5849			NLC	2	1.24	53.2075
	NLC	3	1.2	54.717			NLC	3	1.2	54.717			NLC	3	1.25	52.8302			NLC	3	1.23	53.5849
	NLC	4	1.2	54.717			NLC	4	1.21	54.3396			NLC	4	1.22	53.9623			NLC	4	1.26	52.4528
	RSM	1	1.18	55.4717			RSM	1	1.18	55.4717			RSM	1	1.25	52.8302			RSM	1	1.24	53.2075
	RSM	2	1.17	55.8491			RSM	2	1.16	56.2264			RSM	2	1.2	54.717			RSM	2	1.26	52.4528
	RSM	3	1.17	55.8491			RSM	3	1.17	55.8491			RSM	3	1.26	52.4528			RSM	3	1.24	53.2075
	RSM	4	1.17	55.8491			RSM	4	1.17	55.8491			RSM	4	1.22	53.9623			RSM	4	1.25	52.8302
	LCC	1	1.17	55.8491			LCC	1	1.2	54.717			LCC	1	1.24	53.2075			LCC	1	1.24	53.2075
	LCC	2	1.17	55.8491			LCC	2	1.15	56.6038			LCC	2	1.23	53.5849			LCC	2	1.26	52.4528
	LCC	3	1.19	55.0943			LCC	3	1.16	56.2264			LCC	3	1.2	54.717			LCC	3	1.22	53.9623
	LCC	4	1.17	55.8491			LCC	4	1.16	56.2264			LCC	4	1.27	52.0755			LCC	4	1.27	52.0755
2020	Control	1	1.22	53.9623		2020	Control	1	1.25	52.8302		2020	Control	1	1.26	52.4528		2020	Control	1	1.27	52.0755
	Control	2	1.24	53.2075			Control	2	1.24	53.2075			Control	2	1.24	53.2075			Control	2	1.25	52.8302
	Control	3	1.2	54.717			Control	3	1.25	52.8302			Control	3	1.26	52.4528			Control	3	1.26	52.4528
	Control	4	1.22	53.9623			Control	4	1.18	55.4717			Control	4	1.29	51.3208			Control	4	1.24	53.2075
	NLC	1	1.18	55.4717			NLC	1	1.18	55.4717			NLC	1	1.23	53.5849			NLC	1	1.26	52.4528
	NLC	2	1.2	54.717			NLC	2	1.2	54.717			NLC	2	1.26	52.4528			NLC	2	1.26	52.4528
	NLC	3	1.17	55.8491			NLC	3	1.17	55.8491			NLC	3	1.28	51.6981			NLC	3	1.23	53.5849
	NLC	4	1.18	55.4717			NLC	4	1.18	55.4717			NLC	4	1.25	52.8302			NLC	4	1.28	51.6981
	RSM	1	1.15	56.6038			RSM	1	1.15	56.6038			RSM	1	1.26	52.4528			RSM	1	1.27	52.0755
	RSM	2	1.14	56.9811			RSM	2	1.16	56.2264			RSM	2	1.23	53.5849			RSM	2	1.24	53.2075
	RSM	3	1.13	57.3585			RSM	3	1.13	57.3585			RSM	3	1.22	53.9623			RSM	3	1.25	52.8302
	RSM	4	1.15	56.6038			RSM	4	1.16	56.2264			RSM	4	1.26	52.4528			RSM	4	1.25	52.8302
	LCC	1	1.16	56.2264			LCC	1	1.16	56.2264			LCC	1	1.24	53.2075			LCC	1	1.26	52.4528
	LCC	2	1.13	57.3585			LCC	2	1.13	57.3585			LCC	2	1.26	52.4528			LCC	2	1.27	52.0755
	LCC	3	1.14	56.9811			LCC	3	1.14	56.9811			LCC	3	1.23	53.5849			LCC	3	1.26	52.4528
	LCC	4	1.1	58.4906			LCC	4	1.13	57.3585			LCC	4	1.25	52.8302			LCC	4	1.24	53.2075
2021	Control	1	1.23	53.5849		2021	Control	1	1.23	53.5849		2021	Control	1	1.25	52.8302		2021	Control	1	1.25	52.8302
	Control	2	1.22	53.9623			Control	2	1.26	52.4528			Control	2	1.22	53.9623			Control	2	1.26	52.4528
	Control	3	1.22	53.9623			Control	3	1.2	54.717			Control	3	1.24	53.2075			Control	3	1.23	53.5849
	Control	4	1.26	52.4528			Control	4	1.27	52.0755			Control	4	1.27	52.0755			Control	4	1.27	52.0755
	NLC	1	1.18	55.4717			NLC	1	1.18	55.4717			NLC	1	1.26	52.4528			NLC	1	1.27	52.0755
	NLC	2	1.15	56.6038			NLC	2	1.2	54.717			NLC	2	1.25	52.8302			NLC	2	1.24	53.2075
	NLC	3	1.19	55.0943			NLC	3	1.21	54.3396			NLC	3	1.23	53.5849			NLC	3	1.25	52.8302
	NLC	4	1.2	54.717			NLC	4	1.19	55.0943			NLC	4	1.24	53.2075			NLC	4	1.26	52.4528
	RSM	1	1.15	56.6038			RSM	1	1.15	56.6038			RSM	1	1.28	51.6981			RSM	1	1.24	53.2075
	RSM	2	1.11	58.1132			RSM	2	1.17	55.8491			RSM	2	1.26	52.4528			RSM	2	1.26	52.4528
	RSM	3	1.15	56.6038			RSM	3	1.16	56.2264			RSM	3	1.22	53.9623			RSM	3	1.24	53.2075
	RSM	4	1.13	57.3585			RSM	4	1.14	56.9811			RSM	4	1.26	52.4528			RSM	4	1.28	51.6981
	LCC	1	1.13	57.3585			LCC	1	1.16	56.2264			LCC	1	1.25	52.8302			LCC	1	1.25	52.8302
	LCC	2	1.08	59.2453			LCC	2	1.13	57.3585			LCC	2	1.23	53.5849			LCC	2	1.28	51.6981
	LCC	3	1.11	58.1132			LCC	3	1.15	56.6038			LCC	3	1.2	54.717			LCC	3	1.23	53.5849
	LCC	4	1.12	57.7358			LCC	4	1.18	55.4717			LCC	4	1.22	53.9623			LCC	4	1.22	53.9623

## Sheet: nutrients
Plant nutrients (0-10cm)											Plant nutrients (10-20cm)											Plant nutrients (20-30cm)											Plant nutrients (30-40cm)
Year	Treatment	Rep.	Ca	K	Mg	Cu	Fe	Zn	Mn		Year	Treatment	Rep.	Ca	K	Mg	Cu	Fe	Zn	Mn		Year	Treatment	Rep.	Ca	K	Mg	Cu	Fe	Zn	Mn		Year	Treatment	Rep.	Ca	K	Mg	Cu	Fe	Zn	Mn
2019	Control	1	3.62	0.15	2.25	25.2	8.56	63	28.2		2019	Control	1	3.35	0.18	2.36	28.6	10.2	48.8	24.5		2019	Control	1	4.15	0.18	2.32	25.2	8.25	42.1	20.5		2019	Control	1	4.12	0.15	2.41	21.8	6.35	48.2	26.5
	Control	2	3.42	0.16	2.23	26.4	8.12	55	26.8			Control	2	3.29	0.22	2.45	27.5	11	46.9	30.1			Control	2	3.89	0.22	2.44	24.1	9.15	38.9	26.8			Control	2	3.56	0.14	2.35	26.5	5.36	52.8	24.1
	Control	3	3.55	0.16	2.3	27.1	8.36	64	27.1			Control	3	3.62	0.16	2.39	24.9	7.89	50.2	26.4			Control	3	4.22	0.19	2.12	23.5	9.26	36.8	30.2			Control	3	4.23	0.16	2.12	27.1	4.36	46.5	23.6
	Control	4	3.6	0.15	2.35	24.5	8.45	57	24.6			Control	4	3.45	0.17	2.44	28.9	9.53	51.6	27.1			Control	4	4.33	0.17	2.35	24.6	8.16	40.1	27.1			Control	4	3.99	0.21	2.45	25.6	6.79	47.9	28.7
	NLC	1	3.48	0.18	2.53	26.3	8.39	60	25.2			NLC	1	3.48	0.18	2.53	26.8	10.2	60.2	25.1			NLC	1	4.25	0.16	2.66	28.2	8.32	37.7	26.5			NLC	1	4.35	0.17	2.46	24.3	7.25	45.7	26.9
	NLC	2	3.59	0.14	2.12	28.2	7.89	61	28.9			NLC	2	3.6	0.24	2.41	27.1	12.3	58.9	26.2			NLC	2	3.99	0.23	2.19	30.1	8.92	42.6	30.1			NLC	2	3.62	0.19	2.11	22.8	6.12	50.3	24.3
	NLC	3	3.47	0.18	2.26	25.4	8.92	59	26.3			NLC	3	3.25	0.18	2.56	24.6	7.99	62.1	26.7			NLC	3	4.11	0.19	2.44	26.2	9.36	38.5	21.8			NLC	3	3.94	0.15	2.53	25.7	5.42	46.2	26.1
	NLC	4	3.55	0.16	2.3	26.7	9.32	52	27.2			NLC	4	3.71	0.16	2.42	25.3	8.53	66	24.2			NLC	4	4.26	0.13	2.33	23.1	9.16	39.2	23.9			NLC	4	4.16	0.18	2.2	24.1	4.35	45.9	25.4
	RSM	1	3.68	0.2	2.11	27.1	8.19	54	25.9			RSM	1	3.48	0.17	2.58	28.2	14.6	63.3	24.3			RSM	1	4.15	0.19	2.49	21.5	9.14	41	32.3			RSM	1	4.25	0.18	2.43	28.1	6.19	51.3	26.1
	RSM	2	3.55	0.15	2.34	20.8	10.1	61	27.5			RSM	2	3.65	0.17	2.61	26.5	7.98	64.8	26.6			RSM	2	4.28	0.22	2.16	26.3	9.2	36.9	26.3			RSM	2	3.77	0.17	2.15	23.6	5.32	42.6	27.3
	RSM	3	3.46	0.16	2.3	29.2	8.35	62	26.8			RSM	3	3.66	0.22	2.41	24.1	8.36	60.9	27.5			RSM	3	3.77	0.18	2.45	23.5	8.35	45.6	24.5			RSM	3	3.82	0.16	2.45	26.2	6.16	45.8	26.8
	RSM	4	3.33	0.22	2.32	25.5	9.63	59	28.2			RSM	4	3.19	0.21	2.38	23.5	7.95	58.9	24.1			RSM	4	4.16	0.17	2.33	24.3	8.46	50	25.8			RSM	4	3.66	0.21	2.53	24.2	6.1	57.1	21.4
	LCC	1	3.55	0.15	2.32	26.5	9.35	57	27.1			LCC	1	3.48	0.23	2.49	26.4	8.35	62.5	26.9			LCC	1	4.21	0.23	2.4	26.2	9.3	48.2	26.1			LCC	1	4.56	0.19	2.5	28.1	5.82	51.9	26.6
	LCC	2	3.43	0.2	2.16	24.3	9.1	60	29.5			LCC	2	3.61	0.24	2.66	25.7	9.11	63.3	28.2			LCC	2	3.76	0.21	2.18	21	8.85	35.6	23.5			LCC	2	3.42	0.21	2.16	24	5.62	45.8	24.1
	LCC	3	3.61	0.11	2.35	25.2	8	63	25.4			LCC	3	3.56	0.15	2.48	27.9	10.6	66.1	24.9			LCC	3	4.15	0.18	2.39	23.6	9.36	48.2	23.7			LCC	3	4.16	0.12	2.43	19.5	5.91	49.2	23.4
	LCC	4	3.55	0.2	2.22	23.5	8.35	58	26.3			LCC	4	3.4	0.13	2.54	28.2	10.8	64	26.7			LCC	4	4.26	0.2	2.45	24.3	8.2	45.1	28.3			LCC	4	4.23	0.18	2.26	23.3	5.09	51	24.7
2020	Control	1	3.5	0.17	2.21	23.8	9.25	51	28.1		2020	Control	1	3.25	0.15	2.4	27.2	9.15	58.2	27.1		2020	Control	1	3.89	0.22	2.16	25.1	10.2	35.9	29.1		2020	Control	1	3.85	0.18	2.55	24.5	6.22	56.8	28.9
	Control	2	3.48	0.13	2.28	24.6	8.35	56.2	31			Control	2	3.45	0.16	2.25	25.4	10.2	46.9	25.9			Control	2	4.22	0.17	2.77	26.6	10.9	42.3	25.2			Control	2	4.12	0.16	2.64	26.9	5.89	51	26.2
	Control	3	3.42	0.14	2.33	25.4	8.22	47	24.6			Control	3	3.35	0.2	2.31	29.3	8.56	53.6	26.3			Control	3	4.12	0.19	2.15	27.8	9.23	44.6	36			Control	3	4.36	0.15	2.19	27.2	7.2	55.7	21.5
	Control	4	3.4	0.15	2.27	26.9	8.45	58.2	26.8			Control	4	3.64	0.17	2.42	26.1	7.99	51.5	27.1			Control	4	3.76	0.23	2.44	30.1	8.33	39.1	31.2			Control	4	4.2	0.11	2.43	21.3	6.35	48.2	23.6
	NLC	1	3.62	0.18	2.45	27.7	9.85	62.1	29.3			NLC	1	3.55	0.25	2.31	25.8	12.1	53.1	24.6			NLC	1	4.22	0.24	2.36	24.9	9.05	46.8	30.8			NLC	1	3.45	0.13	2.22	26.2	5.49	45.9	24.6
	NLC	2	3.52	0.2	2.3	24.6	10.35	55.4	28.4			NLC	2	3.75	0.2	2.45	24.7	10.6	62.5	25.5			NLC	2	4.1	0.16	2.44	27.3	12.1	35.6	21.2			NLC	2	4.32	0.1	2.63	24.3	6.84	56.8	25.1
	NLC	3	3.68	0.2	2.39	26.5	10.3	62	27.3			NLC	3	3.68	0.19	2.223	27.5	11.5	66.2	27.3			NLC	3	3.85	0.14	2.35	26.8	9.36	37.2	29.5			NLC	3	3.99	0.2	2.58	25.8	6.75	62.1	28.1
	NLC	4	3.56	0.18	2.22	27.2	10.2	59	26.3			NLC	4	3.89	0.22	2.51	26.4	12.1	67.8	24.9			NLC	4	4.69	0.16	2.67	24.3	9.45	38.2	32.6			NLC	4	4.32	0.22	2.45	26.1	7.23	53.1	24.9
	RSM	1	3.88	0.22	2.35	26.9	13	63	25.9			RSM	1	3.92	0.28	2.14	28.2	13.2	59.2	26.8			RSM	1	4.22	0.19	2.31	26.1	6.54	40.5	30.1			RSM	1	4.22	0.15	2.53	21	6.77	62.7	24
	RSM	2	3.75	0.2	2.22	28.1	13.6	66	29.1			RSM	2	3.85	0.21	2.43	27.4	13.9	68.5	27.3			RSM	2	3.85	0.22	2.38	25.5	8.38	36.5	28.2			RSM	2	3.59	0.19	2.19	24.3	7.15	49.9	28.6
	RSM	3	3.62	0.25	2.43	24.6	14.5	60	27.2			RSM	3	4.1	0.26	2.51	26.3	14.2	71	25.6			RSM	3	4.36	0.23	2.44	21.3	13.2	35.9	25.1			RSM	3	3.95	0.17	2.44	26.1	6.82	52.3	24.7
	RSM	4	3.77	0.23	2.2	25.7	13.2	70	24.5			RSM	4	3.78	0.19	2.4	28.1	12.1	64.2	24.2			RSM	4	4.25	0.19	2.65	23.4	11.6	42.1	29.9			RSM	4	4.33	0.15	2.51	25.3	6.23	51.6	25.1
	LCC	1	3.85	0.28	2.38	28.3	14.1	64	25.6			LCC	1	3.87	0.25	2.19	25.6	14.6	66.3	28.3			LCC	1	3.56	0.23	2.22	23.4	10.5	40.3	30.1			LCC	1	3.56	0.22	2.43	24.8	5.44	50.2	25.8
	LCC	2	3.67	0.24	2.35	29.4	12.1	62	28.3			LCC	2	4.15	0.23	2.28	27.6	12.9	66.4	25.6			LCC	2	4.65	0.22	2.61	21.6	9.2	38	33			LCC	2	4.22	0.11	2.16	23.7	8.21	53.6	26.7
	LCC	3	3.62	0.23	2.22	25.6	13.2	68	27			LCC	3	4.09	0.24	2.37	28.1	13.4	61.3	24.8			LCC	3	3.78	0.18	2.6	25.6	12.3	48.2	25.4			LCC	3	4.55	0.13	2.72	25.9	5.46	56.1	27.2
	LCC	4	3.82	0.2	2.26	26.5	14	72	26.2			LCC	4	3.99	0.28	2.45	24.9	14.9	67.9	26.3			LCC	4	4.25	0.24	2.45	24.3	10.9	46.2	28.1			LCC	4	3.58	0.22	2.4	23.6	6.77	55.8	26.1
2021	Control	1	3.52	0.17	2.33	28.1	8.35	55.6	28.2		2021	Control	1	3.47	0.18	2.42	26.5	11	47.8	24.9		2021	Control	1	4.12	0.27	2.33	21.8	11.3	40.3	22.7		2021	Control	1	4.2	0.14	2.53	26.9	7.3	51.2	28.5
	Control	2	3.5	0.14	2.34	28.6	9.25	57.2	24.5			Control	2	3.36	0.22	2.36	27.4	9.25	56.8	26.8			Control	2	3.85	0.21	2.48	26.3	13.5	42.3	25.6			Control	2	4.53	0.16	2.13	24.2	6.44	46.2	21.4
	Control	3	3.48	0.12	2.36	24.6	8.35	58.9	29.2			Control	3	3.42	0.16	2.51	25.9	7.56	62.3	27.3			Control	3	3.99	0.13	2.31	24.6	8.52	50.6	29.4			Control	3	3.82	0.18	2.46	26.3	5.89	54	26.3
	Control	4	3.39	0.13	2.28	23.5	9.21	60.2	26.6			Control	4	3.39	0.17	2.33	29.1	8.63	54.9	27			Control	4	4.22	0.16	2.19	23.9	7.99	45.6	27.1			Control	4	3.44	0.18	2.53	21.2	6.75	43.9	24.2
	NLC	1	3.72	0.22	2.42	26.4	12.2	64.5	25.4			NLC	1	3.78	0.24	2.4	26.1	13.2	62.1	28.1			NLC	1	3.88	0.25	2.56	24.1	14.1	42.8	23.9			NLC	1	4.82	0.15	2.46	23.3	5.18	54.8	27.8
	NLC	2	3.75	0.23	2.34	26.3	10.8	62.5	24.3			NLC	2	3.92	0.29	2.48	25.3	14.2	65.6	24.6			NLC	2	4.16	0.11	2.22	23.6	8.35	37.8	25.8			NLC	2	3.87	0.17	2.44	25.1	6.45	48.3	28.1
	NLC	3	3.65	0.2	2.33	23.8	13.1	68.5	26.8			NLC	3	3.88	0.19	2.15	24.1	13.9	58.2	25.3			NLC	3	4.3	0.16	2.46	24.3	7.65	42.8	26.3			NLC	3	3.55	0.19	2.16	21.4	6.31	47.7	24.7
	NLC	4	3.72	0.28	2.34	21.5	12.6	67.1	27.3			NLC	4	4.12	0.23	2.43	29.4	11.8	63.1	21.9			NLC	4	4.11	0.22	2.55	25.2	13.5	44.7	27.1			NLC	4	3.67	0.2	2.56	26.4	6.36	43.5	26.2
	RSM	1	3.82	0.28	2.42	26.3	15.3	70.5	25.5			RSM	1	4.19	0.25	2.52	25	12.6	66.1	29.5			RSM	1	3.78	0.19	2.16	21.9	14.1	39.2	26.1			RSM	1	4.05	0.18	2.33	22.8	6.45	48.9	25.4
	RSM	2	3.95	0.26	2.32	25.6	16.2	72	26.1			RSM	2	4.1	0.3	2.31	26.2	14.3	62.7	24.1			RSM	2	3.89	0.26	2.33	23.8	15	48.6	25.4			RSM	2	3.88	0.21	2.48	24.3	7.25	43.7	24
	RSM	3	3.68	0.24	2.18	25.3	15.2	74	28.2			RSM	3	4.23	0.21	2.18	24.5	13.2	67.2	25.2			RSM	3	4.37	0.15	2.4	24.2	8.35	45.6	24.6			RSM	3	4.16	0.19	2.11	20.9	5.42	46.2	25.8
	RSM	4	3.99	0.29	2.22	22	14.8	73.2	24.3			RSM	4	3.87	0.34	2.29	27.8	16.2	65.4	28.2			RSM	4	4.22	0.17	2.33	25.6	7.65	50.2	25.9			RSM	4	4.23	0.22	2.5	25.6	6.15	45.1	25.3
	LCC	1	3.77	0.28	2.35	25.9	18.2	71	26.2			LCC	1	4.12	0.27	2.35	26.7	17.1	64.2	27.4			LCC	1	3.85	0.25	2.5	26.8	7.99	36.7	21.8			LCC	1	4.15	0.16	2.63	21.3	7.22	46.9	26.1
	LCC	2	3.89	0.24	2.43	26.5	16.2	73.8	28.2			LCC	2	4.26	0.28	2.41	25.4	15.1	66.3	26.5			LCC	2	4.36	0.22	2.1	30.2	9.35	35.9	24.6			LCC	2	3.65	0.19	2.41	22.8	7.01	47.3	24.9
	LCC	3	3.82	0.28	2.4	27.2	14.6	73.5	24.6			LCC	3	4.1	0.24	2.51	24.3	14.6	65.2	26.6			LCC	3	3.64	0.11	2.19	27.26	9.77	48.2	25.9			LCC	3	4.25	0.21	2.19	24.7	5.61	46.5	26.8
	LCC	4	3.9	0.3	2.28	24.6	16.8	73.1	26.3			LCC	4	4.05	0.27	2.37	28.5	13.6	67.2	24			LCC	4	4.25	0.14	2.89	26.9	12.9	46.3	24.8			LCC	4	3.77	0.22	2.36	25.1	6.89	51.2	23.5

## Sheet: correlation
		BD	Ca	K	Mg	Cu	Fe	Zn	Mn
		1.23	3.62	0.15	2.25	25.2	8.56	63	28.2
		1.2	3.42	0.16	2.23	26.4	8.12	55	26.8
		1.22	3.55	0.16	2.3	27.1	8.36	64	27.1
		1.19	3.6	0.15	2.35	24.5	8.45	57	24.6
		1.21	3.48	0.18	2.53	26.3	8.39	60	25.2
		1.2	3.59	0.14	2.12	28.2	7.89	61	28.9
		1.2	3.47	0.18	2.26	25.4	8.92	59	26.3
		1.2	3.55	0.16	2.3	26.7	9.32	52	27.2
		1.18	3.68	0.2	2.11	27.1	8.19	54	25.9
		1.17	3.55	0.15	2.34	20.8	10.1	61	27.5
		1.17	3.46	0.16	2.3	29.2	8.35	62	26.8
		1.17	3.33	0.22	2.32	25.5	9.63	59	28.2
		1.17	3.55	0.15	2.32	26.5	9.35	57	27.1
		1.17	3.43	0.2	2.16	24.3	9.1	60	29.5
		1.19	3.61	0.11	2.35	25.2	8	63	25.4
		1.17	3.55	0.2	2.22	23.5	8.35	58	26.3
		1.22	3.5	0.17	2.21	23.8	9.25	51	28.1
		1.24	3.48	0.13	2.28	24.6	8.35	56.2	31
		1.2	3.42	0.14	2.33	25.4	8.22	47	24.6
		1.22	3.4	0.15	2.27	26.9	8.45	58.2	26.8
		1.18	3.62	0.18	2.45	27.7	9.85	62.1	29.3
		1.2	3.52	0.2	2.3	24.6	10.35	55.4	28.4
		1.17	3.68	0.2	2.39	26.5	10.3	62	27.3
		1.18	3.56	0.18	2.22	27.2	10.2	59	26.3
		1.15	3.88	0.22	2.35	26.9	13	63	25.9
		1.14	3.75	0.2	2.22	28.1	13.6	66	29.1
		1.13	3.62	0.25	2.43	24.6	14.5	60	27.2
		1.15	3.77	0.23	2.2	25.7	13.2	70	24.5
		1.16	3.85	0.28	2.38	28.3	14.1	64	25.6
		1.13	3.67	0.24	2.35	29.4	12.1	62	28.3
		1.14	3.62	0.23	2.22	25.6	13.2	68	27
		1.1	3.82	0.2	2.26	26.5	14	72	26.2
		1.23	3.52	0.17	2.33	28.1	8.35	55.6	28.2
		1.22	3.5	0.14	2.34	28.6	9.25	57.2	24.5
		1.22	3.48	0.12	2.36	24.6	8.35	58.9	29.2
		1.26	3.39	0.13	2.28	23.5	9.21	60.2	26.6
		1.18	3.72	0.22	2.42	26.4	12.2	64.5	25.4
		1.15	3.75	0.23	2.34	26.3	10.8	62.5	24.3
		1.19	3.65	0.2	2.33	23.8	13.1	68.5	26.8
		1.2	3.72	0.28	2.34	21.5	12.6	67.1	27.3
		1.15	3.82	0.28	2.42	26.3	15.3	70.5	25.5
		1.11	3.95	0.26	2.32	25.6	16.2	72	26.1
		1.15	3.68	0.24	2.18	25.3	15.2	74	28.2
		1.13	3.99	0.29	2.22	22	14.8	73.2	24.3
		1.13	3.77	0.28	2.35	25.9	18.2	71	26.2
		1.08	3.89	0.24	2.43	26.5	16.2	73.8	28.2
		1.11	3.82	0.28	2.4	27.2	14.6	73.5	24.6
		1.12	3.9	0.3	2.28	24.6	16.8	73.1	26.3
		1.23	3.35	0.18	2.36	28.6	10.2	48.8	24.5
		1.2	3.29	0.22	2.45	27.5	11	46.9	30.1
		1.24	3.62	0.16	2.39	24.9	7.89	50.2	26.4
		1.24	3.45	0.17	2.44	28.9	9.53	51.6	27.1
		1.21	3.48	0.18	2.53	26.8	10.2	60.2	25.1
		1.19	3.6	0.24	2.41	27.1	12.3	58.9	26.2
		1.2	3.25	0.18	2.56	24.6	7.99	62.1	26.7
		1.21	3.71	0.16	2.42	25.3	8.53	66	24.2
		1.18	3.48	0.17	2.58	28.2	14.6	63.3	24.3
		1.16	3.65	0.17	2.61	26.5	7.98	64.8	26.6
		1.17	3.66	0.22	2.41	24.1	8.36	60.9	27.5
		1.17	3.19	0.21	2.38	23.5	7.95	58.9	24.1
		1.2	3.48	0.23	2.49	26.4	8.35	62.5	26.9
		1.15	3.61	0.24	2.66	25.7	9.11	63.3	28.2
		1.16	3.56	0.15	2.48	27.9	10.6	66.1	24.9
		1.16	3.4	0.13	2.54	28.2	10.8	64	26.7
		1.25	3.25	0.15	2.4	27.2	9.15	58.2	27.1
		1.24	3.45	0.16	2.25	25.4	10.2	46.9	25.9
		1.25	3.35	0.2	2.31	29.3	8.56	53.6	26.3
		1.18	3.64	0.17	2.42	26.1	7.99	51.5	27.1
		1.18	3.55	0.25	2.31	25.8	12.1	53.1	24.6
		1.2	3.75	0.2	2.45	24.7	10.6	62.5	25.5
		1.17	3.68	0.19	2.223	27.5	11.5	66.2	27.3
		1.18	3.89	0.22	2.51	26.4	12.1	67.8	24.9
		1.15	3.92	0.28	2.14	28.2	13.2	59.2	26.8
		1.16	3.85	0.21	2.43	27.4	13.9	68.5	27.3
		1.13	4.1	0.26	2.51	26.3	14.2	71	25.6
		1.16	3.78	0.19	2.4	28.1	12.1	64.2	24.2
		1.16	3.87	0.25	2.19	25.6	14.6	66.3	28.3
		1.13	4.15	0.23	2.28	27.6	12.9	66.4	25.6
		1.14	4.09	0.24	2.37	28.1	13.4	61.3	24.8
		1.13	3.99	0.28	2.45	24.9	14.9	67.9	26.3
		1.23	3.47	0.18	2.42	26.5	11	47.8	24.9
		1.26	3.36	0.22	2.36	27.4	9.25	56.8	26.8
		1.2	3.42	0.16	2.51	25.9	7.56	62.3	27.3
		1.27	3.39	0.17	2.33	29.1	8.63	54.9	27
		1.18	3.78	0.24	2.4	26.1	13.2	62.1	28.1
		1.2	3.92	0.29	2.48	25.3	14.2	65.6	24.6
		1.21	3.88	0.19	2.15	24.1	13.9	58.2	25.3
		1.19	4.12	0.23	2.43	29.4	11.8	63.1	21.9
		1.15	4.19	0.25	2.52	25	12.6	66.1	29.5
		1.17	4.1	0.3	2.31	26.2	14.3	62.7	24.1
		1.16	4.23	0.21	2.18	24.5	13.2	67.2	25.2
		1.14	3.87	0.34	2.29	27.8	16.2	65.4	28.2
		1.16	4.12	0.27	2.35	26.7	17.1	64.2	27.4
		1.13	4.26	0.28	2.41	25.4	15.1	66.3	26.5
		1.15	4.1	0.24	2.51	24.3	14.6	65.2	26.6
		1.18	4.05	0.27	2.37	28.5	13.6	67.2	24
		1.28	4.15	0.18	2.32	25.2	8.25	42.1	20.5
		1.26	3.89	0.22	2.44	24.1	9.15	38.9	26.8
		1.24	4.22	0.19	2.12	23.5	9.26	36.8	30.2
		1.27	4.33	0.17	2.35	24.6	8.16	40.1	27.1
		1.26	4.25	0.16	2.66	28.2	8.32	37.7	26.5
		1.23	3.99	0.23	2.19	30.1	8.92	42.6	30.1
		1.25	4.11	0.19	2.44	26.2	9.36	38.5	21.8
		1.22	4.26	0.13	2.33	23.1	9.16	39.2	23.9
		1.25	4.15	0.19	2.49	21.5	9.14	41	32.3
		1.2	4.28	0.22	2.16	26.3	9.2	36.9	26.3
		1.26	3.77	0.18	2.45	23.5	8.35	45.6	24.5
		1.22	4.16	0.17	2.33	24.3	8.46	50	25.8
		1.24	4.21	0.23	2.4	26.2	9.3	48.2	26.1
		1.23	3.76	0.21	2.18	21	8.85	35.6	23.5
		1.2	4.15	0.18	2.39	23.6	9.36	48.2	23.7
		1.27	4.26	0.2	2.45	24.3	8.2	45.1	28.3
		1.26	3.89	0.22	2.16	25.1	10.2	35.9	29.1
		1.24	4.22	0.17	2.77	26.6	10.9	42.3	25.2
		1.26	4.12	0.19	2.15	27.8	9.23	44.6	36
		1.29	3.76	0.23	2.44	30.1	8.33	39.1	31.2
		1.23	4.22	0.24	2.36	24.9	9.05	46.8	30.8
		1.26	4.1	0.16	2.44	27.3	12.1	35.6	21.2
		1.28	3.85	0.14	2.35	26.8	9.36	37.2	29.5
		1.25	4.69	0.16	2.67	24.3	9.45	38.2	32.6
		1.26	4.22	0.19	2.31	26.1	6.54	40.5	30.1
		1.23	3.85	0.22	2.38	25.5	8.38	36.5	28.2
		1.22	4.36	0.23	2.44	21.3	13.2	35.9	25.1
		1.26	4.25	0.19	2.65	23.4	11.6	42.1	29.9
		1.24	3.56	0.23	2.22	23.4	10.5	40.3	30.1
		1.26	4.65	0.22	2.61	21.6	9.2	38	33
		1.23	3.78	0.18	2.6	25.6	12.3	48.2	25.4
		1.25	4.25	0.24	2.45	24.3	10.9	46.2	28.1
		1.25	4.12	0.27	2.33	21.8	11.3	40.3	22.7
		1.22	3.85	0.21	2.48	26.3	13.5	42.3	25.6
		1.24	3.99	0.13	2.31	24.6	8.52	50.6	29.4
		1.27	4.22	0.16	2.19	23.9	7.99	45.6	27.1
		1.26	3.88	0.25	2.56	24.1	14.1	42.8	23.9
		1.25	4.16	0.11	2.22	23.6	8.35	37.8	25.8
		1.23	4.3	0.16	2.46	24.3	7.65	42.8	26.3
		1.24	4.11	0.22	2.55	25.2	13.5	44.7	27.1
		1.28	3.78	0.19	2.16	21.9	14.1	39.2	26.1
		1.26	3.89	0.26	2.33	23.8	15	48.6	25.4
		1.22	4.37	0.15	2.4	24.2	8.35	45.6	24.6
		1.26	4.22	0.17	2.33	25.6	7.65	50.2	25.9
		1.25	3.85	0.25	2.5	26.8	7.99	36.7	21.8
		1.23	4.36	0.22	2.1	30.2	9.35	35.9	24.6
		1.2	3.64	0.11	2.19	27.26	9.77	48.2	25.9
		1.22	4.25	0.14	2.89	26.9	12.9	46.3	24.8
		1.24	4.12	0.15	2.41	21.8	6.35	48.2	26.5
		1.25	3.56	0.14	2.35	26.5	5.36	52.8	24.1
		1.24	4.23	0.16	2.12	27.1	4.36	46.5	23.6
		1.26	3.99	0.21	2.45	25.6	6.79	47.9	28.7
		1.25	4.35	0.17	2.46	24.3	7.25	45.7	26.9
		1.24	3.62	0.19	2.11	22.8	6.12	50.3	24.3
		1.23	3.94	0.15	2.53	25.7	5.42	46.2	26.1
		1.26	4.16	0.18	2.2	24.1	4.35	45.9	25.4
		1.24	4.25	0.18	2.43	28.1	6.19	51.3	26.1
		1.26	3.77	0.17	2.15	23.6	5.32	42.6	27.3
		1.24	3.82	0.16	2.45	26.2	6.16	45.8	26.8
		1.25	3.66	0.21	2.53	24.2	6.1	57.1	21.4
		1.24	4.56	0.19	2.5	28.1	5.82	51.9	26.6
		1.26	3.42	0.21	2.16	24	5.62	45.8	24.1
		1.22	4.16	0.12	2.43	19.5	5.91	49.2	23.4
		1.27	4.23	0.18	2.26	23.3	5.09	51	24.7
		1.27	3.85	0.18	2.55	24.5	6.22	56.8	28.9
		1.25	4.12	0.16	2.64	26.9	5.89	51	26.2
		1.26	4.36	0.15	2.19	27.2	7.2	55.7	21.5
		1.24	4.2	0.11	2.43	21.3	6.35	48.2	23.6
		1.26	3.45	0.13	2.22	26.2	5.49	45.9	24.6
		1.26	4.32	0.1	2.63	24.3	6.84	56.8	25.1
		1.23	3.99	0.2	2.58	25.8	6.75	62.1	28.1
		1.28	4.32	0.22	2.45	26.1	7.23	53.1	24.9
		1.27	4.22	0.15	2.53	21	6.77	62.7	24
		1.24	3.59	0.19	2.19	24.3	7.15	49.9	28.6
		1.25	3.95	0.17	2.44	26.1	6.82	52.3	24.7
		1.25	4.33	0.15	2.51	25.3	6.23	51.6	25.1
		1.26	3.56	0.22	2.43	24.8	5.44	50.2	25.8
		1.27	4.22	0.11	2.16	23.7	8.21	53.6	26.7
		1.26	4.55	0.13	2.72	25.9	5.46	56.1	27.2
		1.24	3.58	0.22	2.4	23.6	6.77	55.8	26.1
		1.25	4.2	0.14	2.53	26.9	7.3	51.2	28.5
		1.26	4.53	0.16	2.13	24.2	6.44	46.2	21.4
		1.23	3.82	0.18	2.46	26.3	5.89	54	26.3
		1.27	3.44	0.18	2.53	21.2	6.75	43.9	24.2
		1.27	4.82	0.15	2.46	23.3	5.18	54.8	27.8
		1.24	3.87	0.17	2.44	25.1	6.45	48.3	28.1
		1.25	3.55	0.19	2.16	21.4	6.31	47.7	24.7
		1.26	3.67	0.2	2.56	26.4	6.36	43.5	26.2
		1.24	4.05	0.18	2.33	22.8	6.45	48.9	25.4
		1.26	3.88	0.21	2.48	24.3	7.25	43.7	24
		1.24	4.16	0.19	2.11	20.9	5.42	46.2	25.8
		1.28	4.23	0.22	2.5	25.6	6.15	45.1	25.3
		1.25	4.15	0.16	2.63	21.3	7.22	46.9	26.1
		1.28	3.65	0.19	2.41	22.8	7.01	47.3	24.9
		1.23	4.25	0.21	2.19	24.7	5.61	46.5	26.8
		1.22	3.77	0.22	2.36	25.1	6.89	51.2	23.5
